# Supplementary material for: Dynamic Changes of Dental Plaque and Saliva Microbiota in OSCC Progression
Source: Research Square preprint supplement (doi:10.21203/rs.3.rs-6143003/v1), 2025-03-11
Supplement: Supplementary file 1 [file ffe67edf584d2f442b2b6fb7.docx]

***Supplementary Material***

**Dynamic Changes of Dental Plaque and Saliva Microbiota in OSCC Progression**

**Man Zhang1,2#, Hailin Zhang1#, Ao Hong3, Jing Huang3, Lirong Yang1, Ying Long1*, Zheng Yu2*******

1The Affiliated Cancer Hospital of Xiangya School of Medicine/Hunan Cancer Hospital, Central South University, Changsha, Hunan, China

2Human Microbiome and Health Group, Department of Microbiology, School of Basic Medical Science, Central South University, Changsha, Hunan, China

3Department of Parasitology, School of Basic Medical Science, Central South University, Changsha, Hunan, China

*** Correspondence:**

Hailin Zhang, [zhahali@163.com;](mailto:zhahali@163.com;) Ying Long, [longying@hnca.org.cn;](mailto:longying@hnca.org.cn;) Zheng Yu, [yuzheng@csu.edu.cn](mailto:yuzheng@csu.edu.cn)

**Supplementary Figures**

**
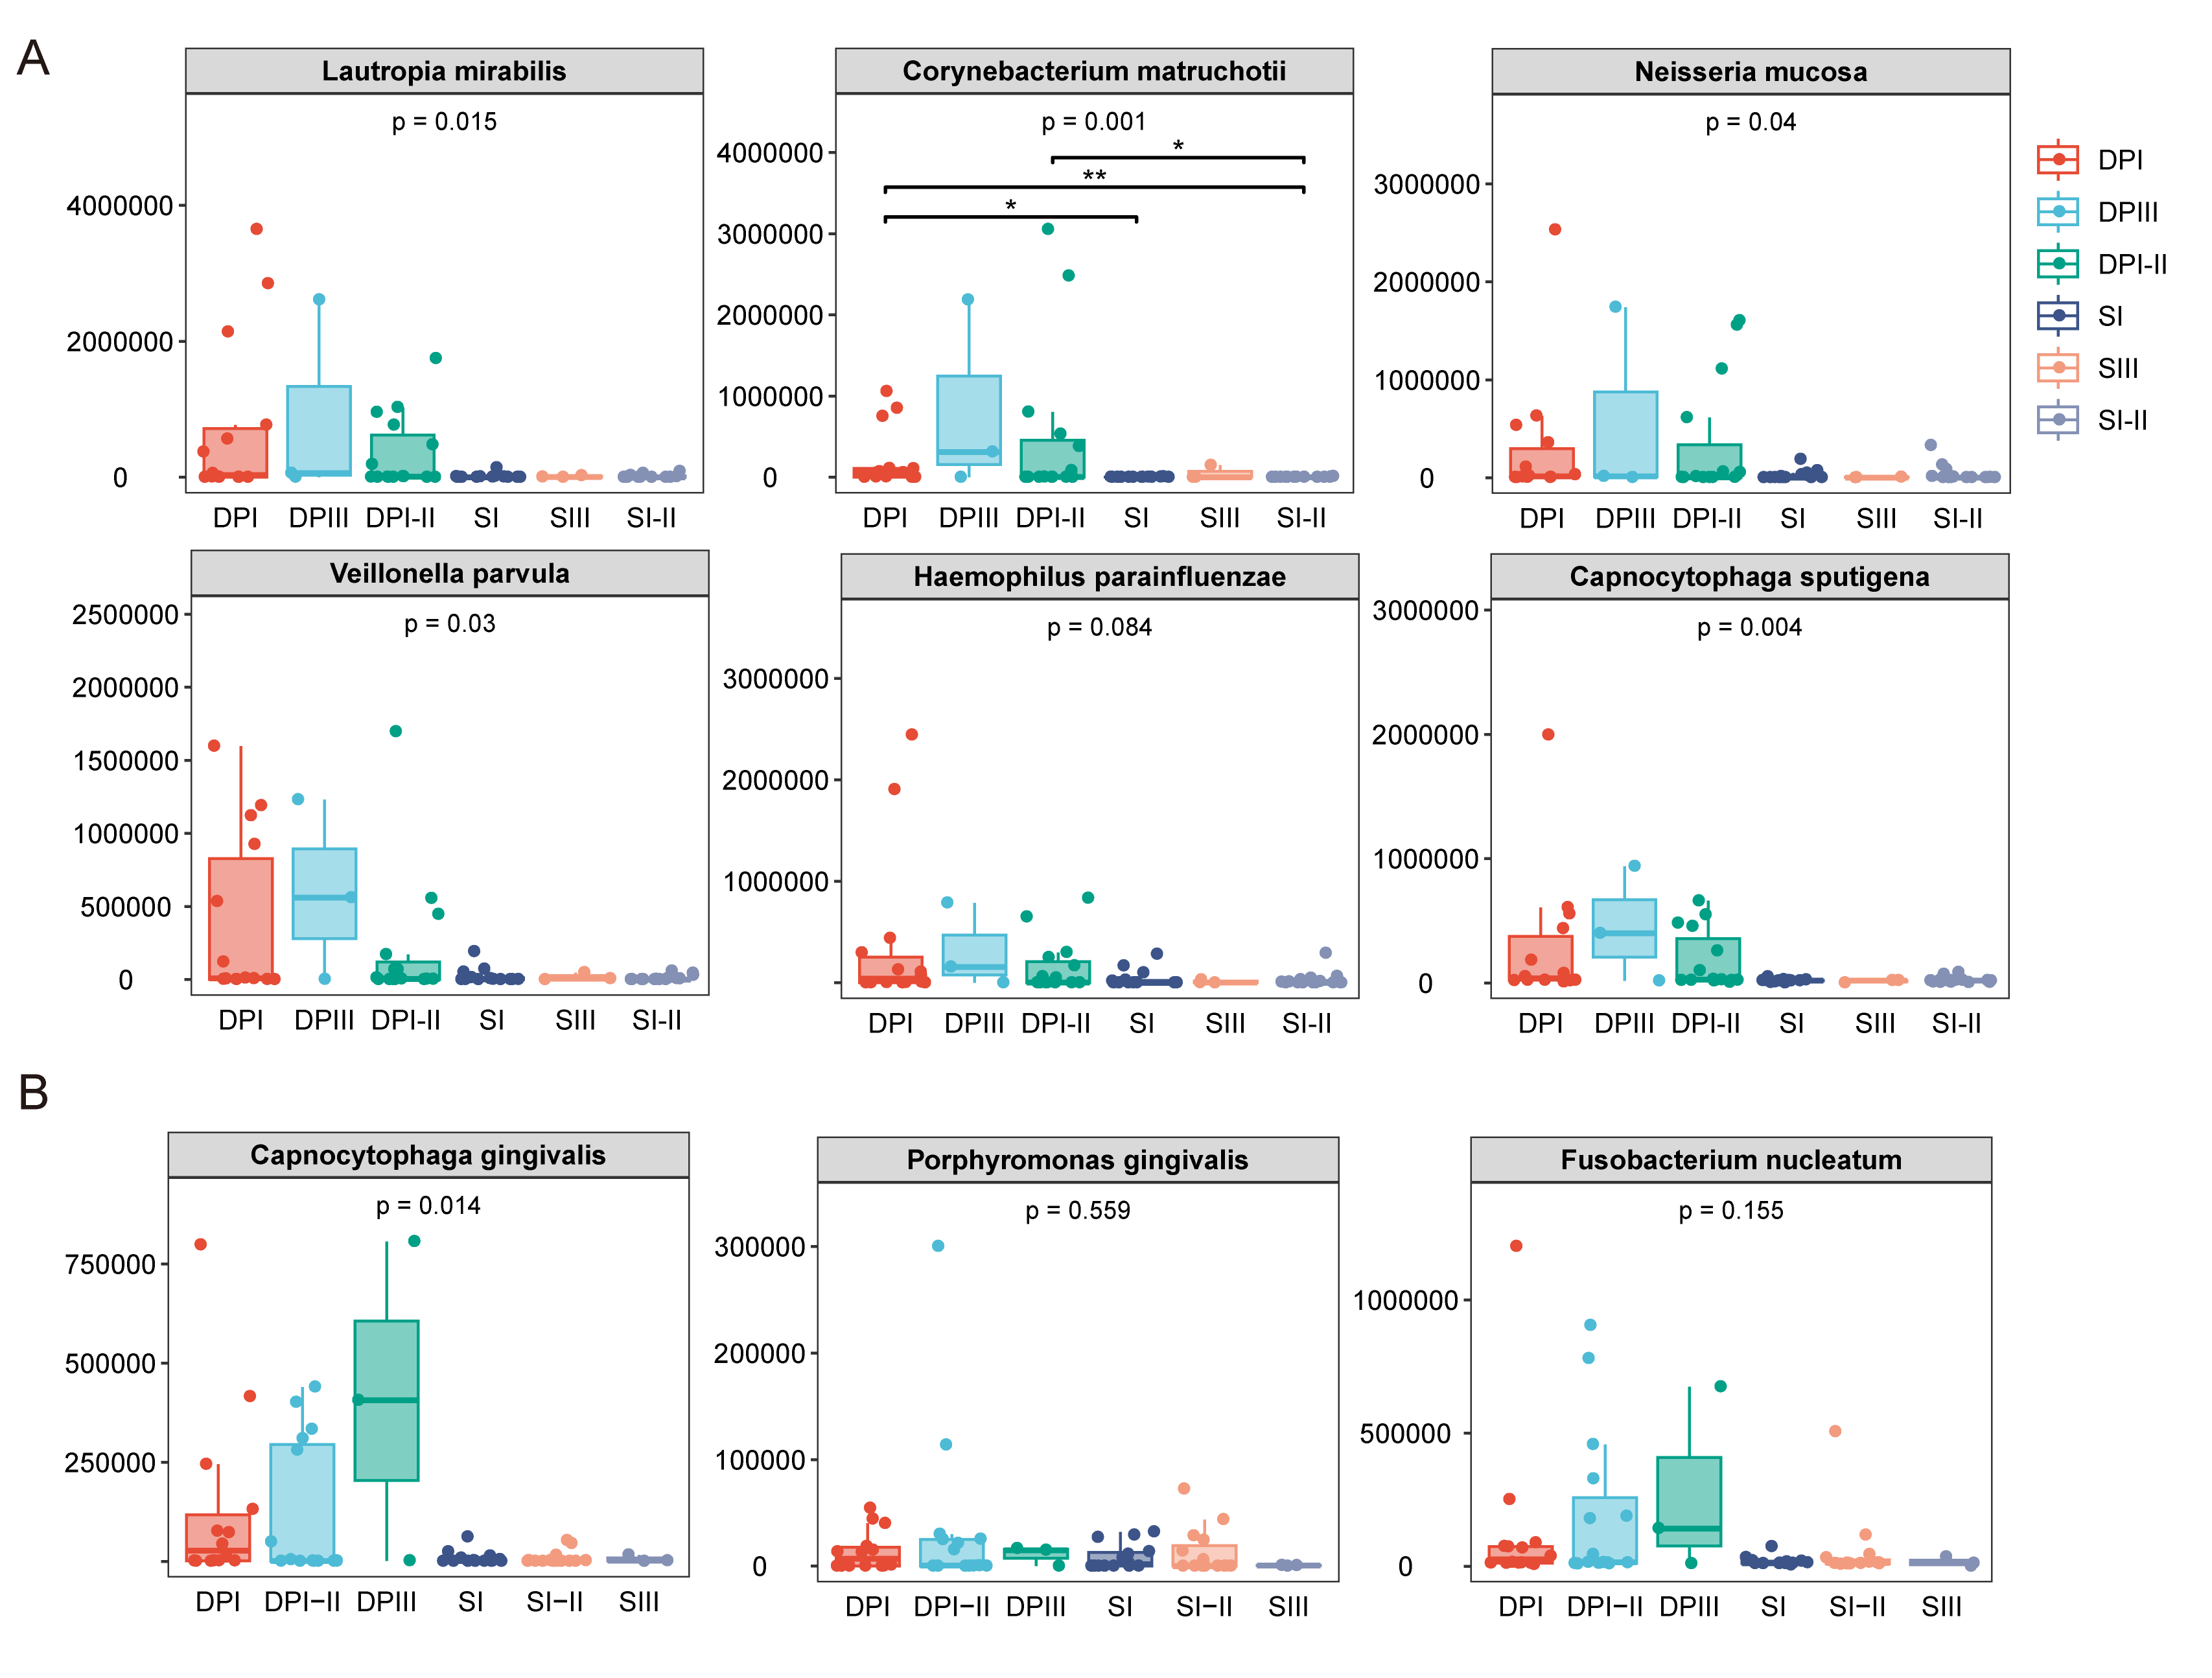
**

**Supplementary Figure1.** The Kruskal-Wallis rank sum test was used to demonstrate the differences in the relative abundance of species among multiple groups (**P* < 0.05, ***P* < 0.01, ****P* < 0.001).


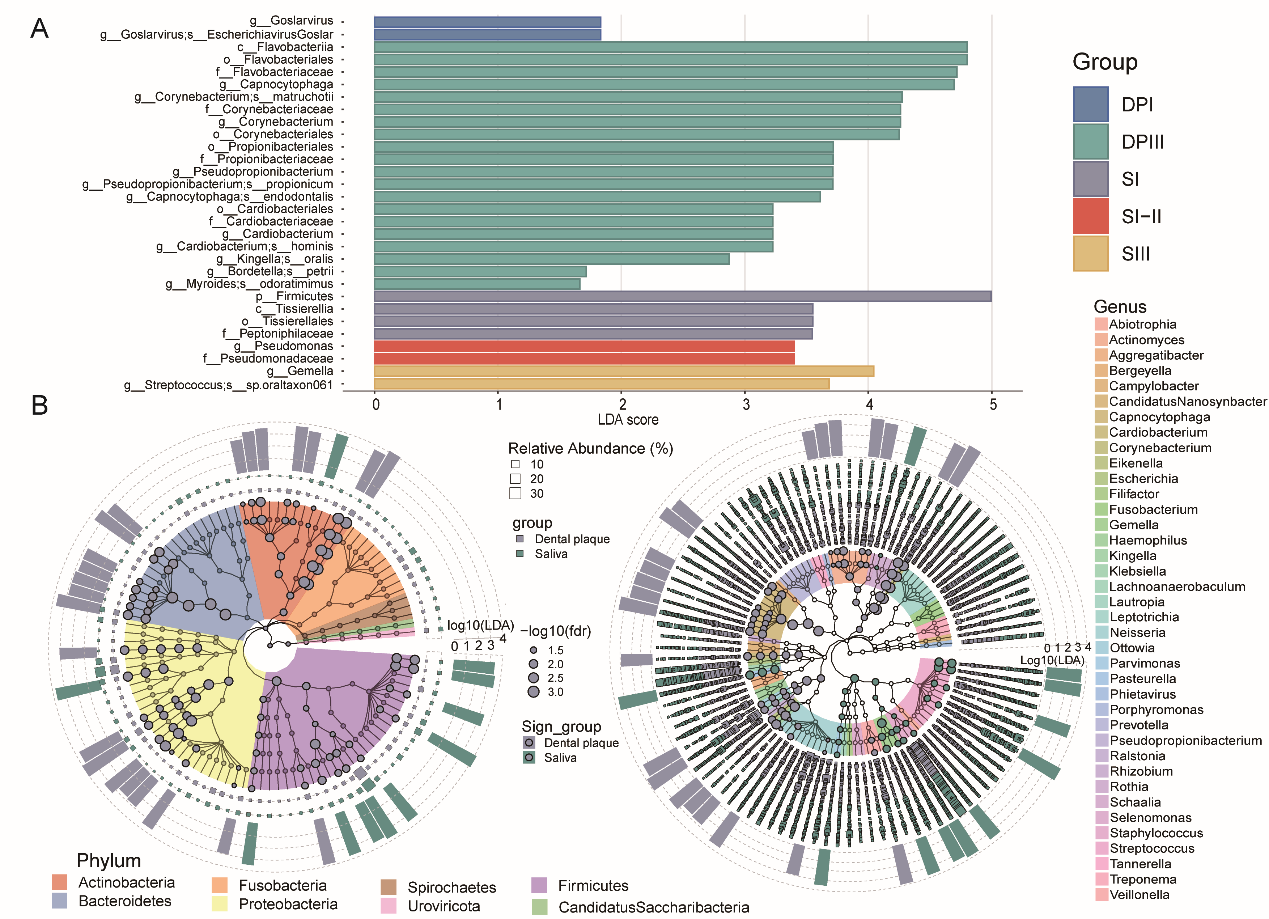


**Supplementary Figure2.** LEfSe (Linear discriminant analysis Effect Size) is utilized to identify species (biomarkers) exhibiting significant differences in abundance between groups, with a threshold set at *P* < 0.05. **(A)** The top 30 species with highest LDA scores are displayed. **(B)** Evolutionary bifurcation diagram at the phylum level. Circles radiating from inside to outside represent taxonomic levels from phylum to genus. Different colors denote distinct phyla, with bar lengths indicating the magnitude of LDA scores and color reflecting group differentiation. **(C)** Evolutionary bifurcation diagram at the genus level. Different colors indicate diverse genera.


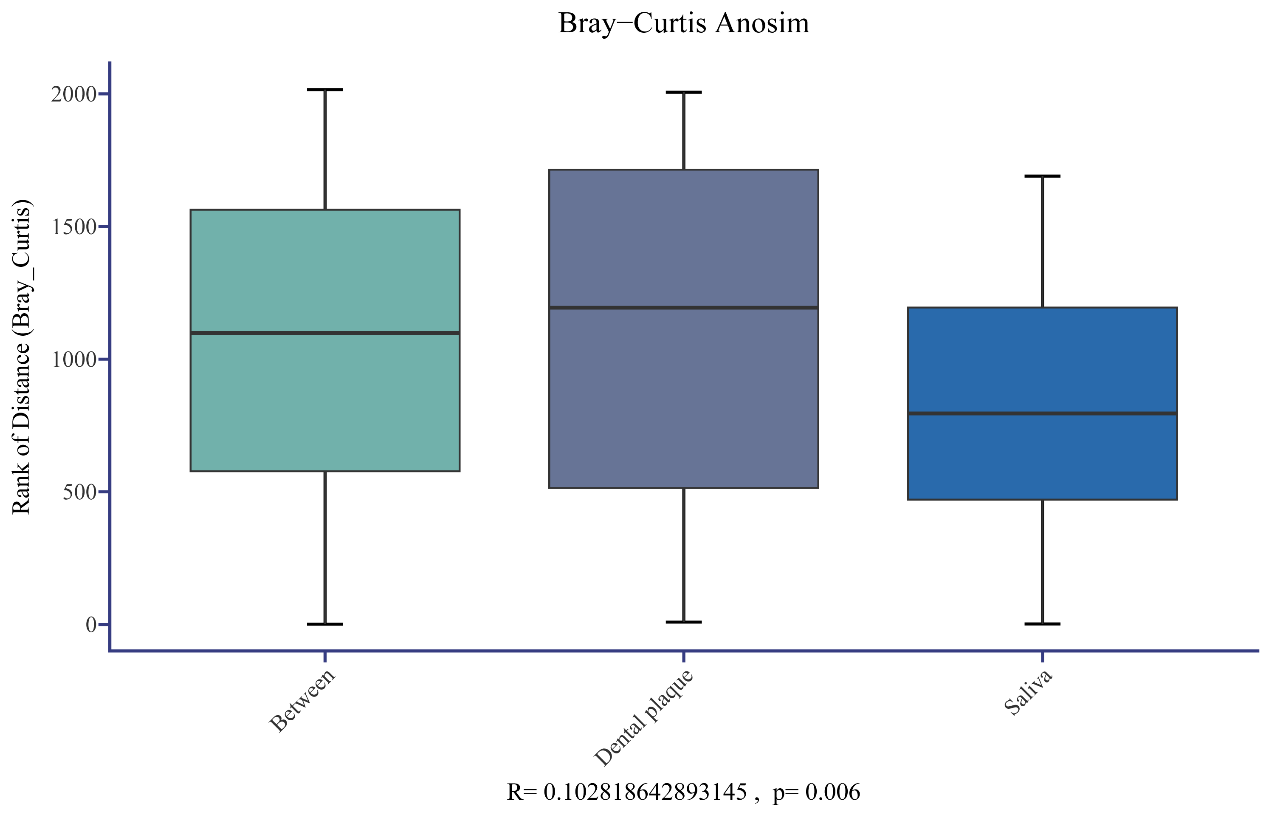


**Supplementary Figure3.** The community composition differences between saliva and dental plaque were tested using Analysis of Similarities (Anosim), a non-parametric method based on permutation and rank sum tests. The adosim function in the vegan package was employed for anosim analysis with 999 permutations based on Bray Curtis Distance. Different colors represent distinct groups, while the y-axis indicates the magnitude of Bray Curtis distances for different groups.


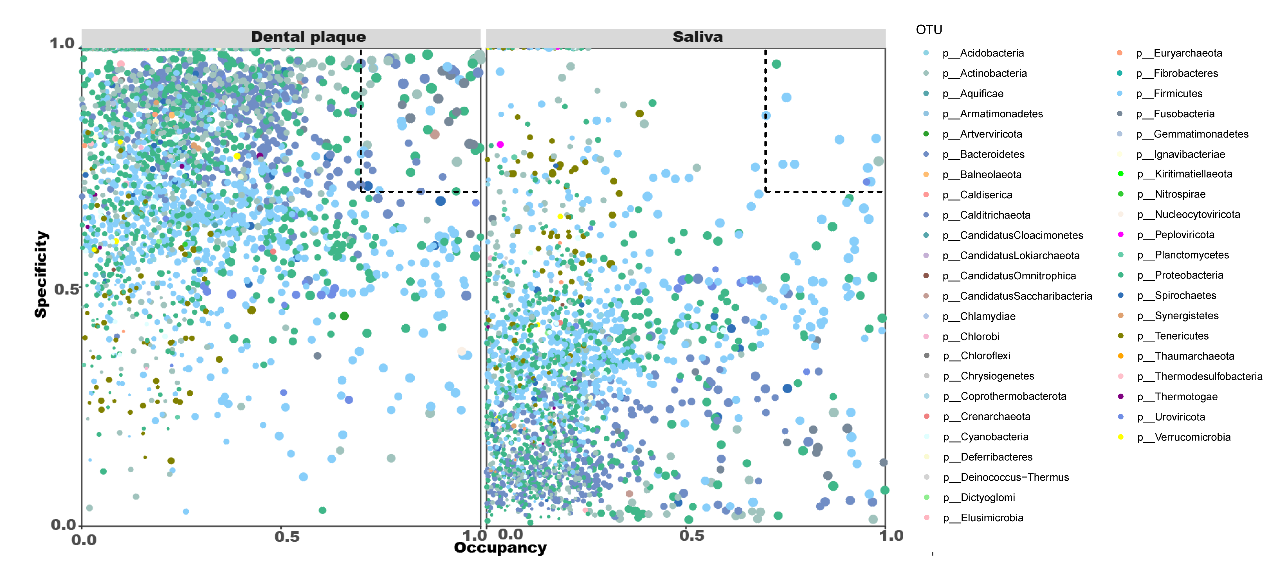


**Supplementary Figure4.** The composition of specialized species at the phylum level in saliva and dental plaque is depicted in the figure. The figure includes SPEC-OCCU plots for all species, where the X-axis represents occupancy, and the Y-axis represents specificity. Species with both occupancy and specificity greater than 0.7 are identified as specialized species, marked with dashed lines in the plot.


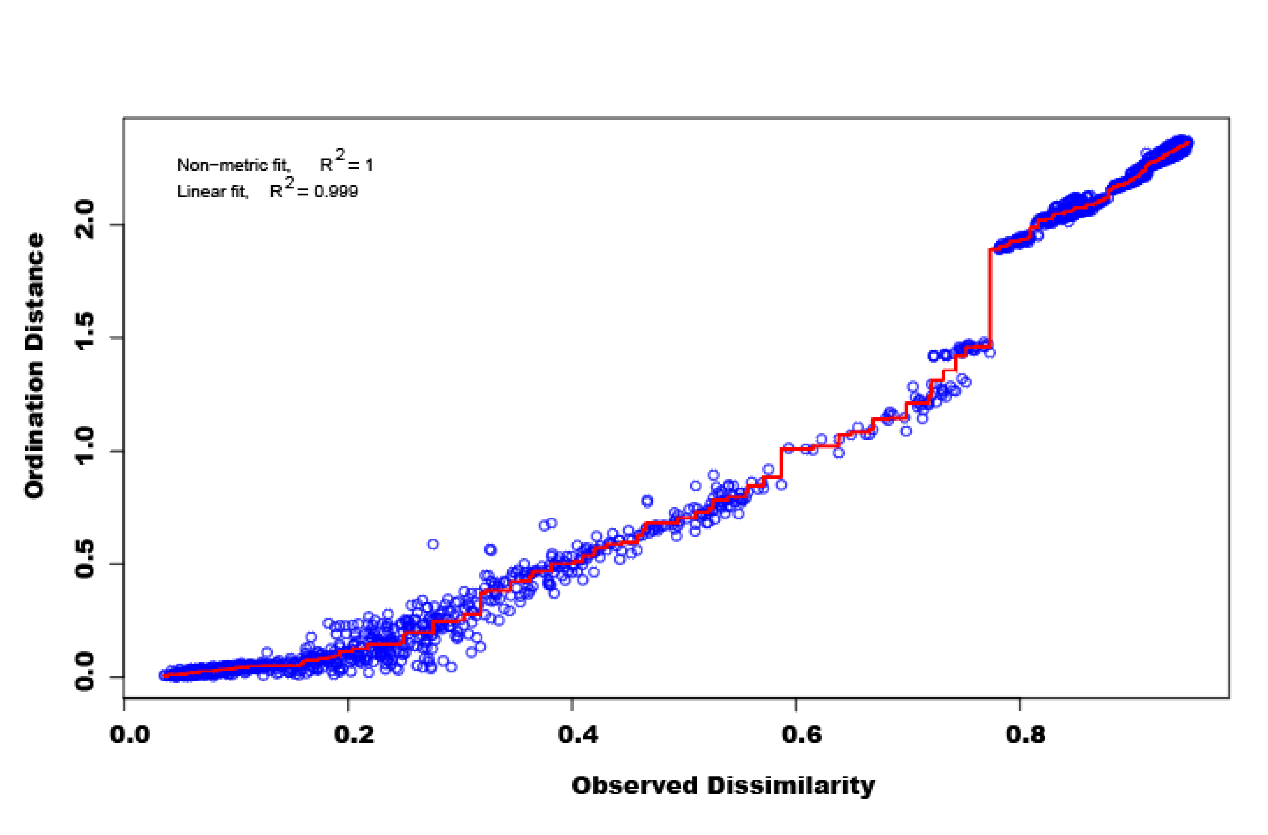


**Supplementary Figure5.** NMDS suitability test, basically all points are concentrated near the line segment, indicating that the data can be detected by NMDS.


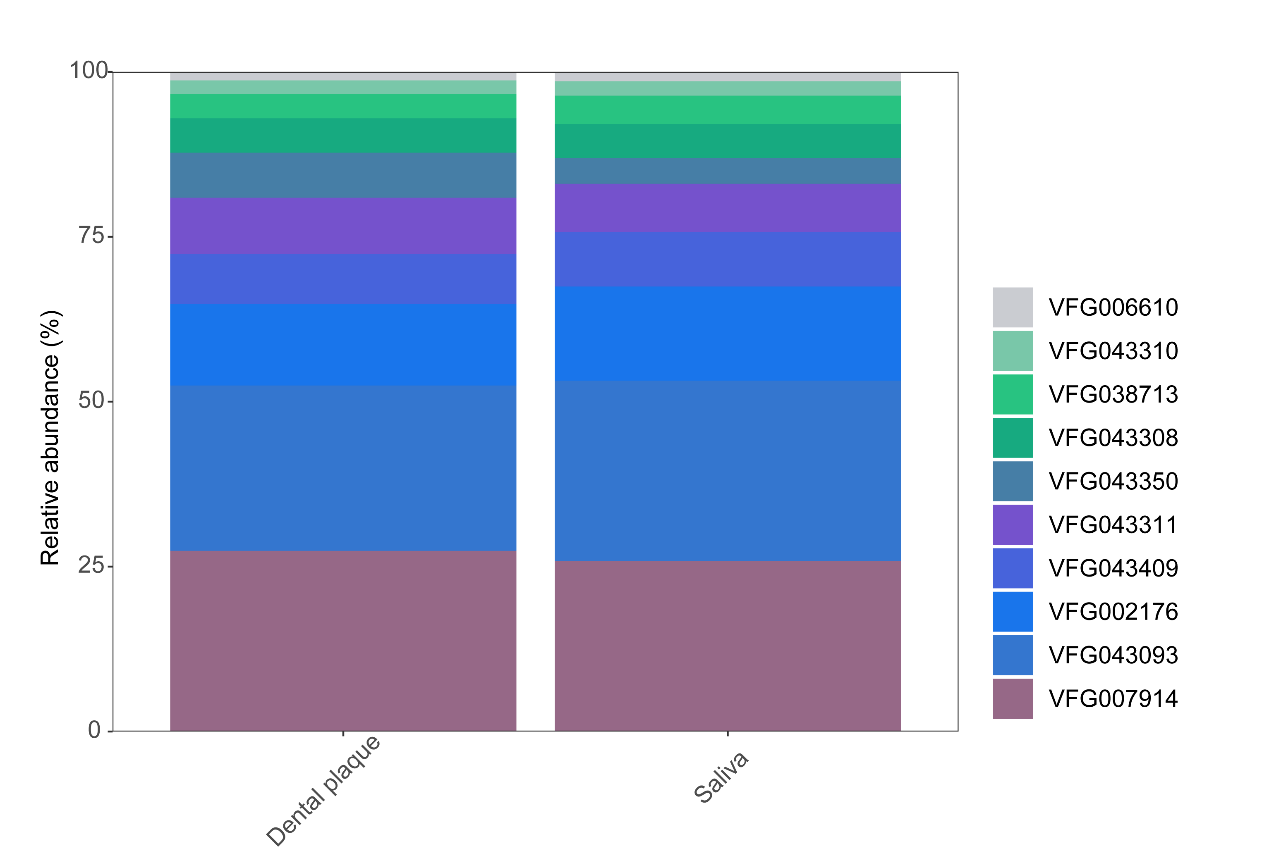


**Supplementary Figure6.** The composition of the top 10 virulence factors in the relative abundance rankings of saliva and dental plaque groups


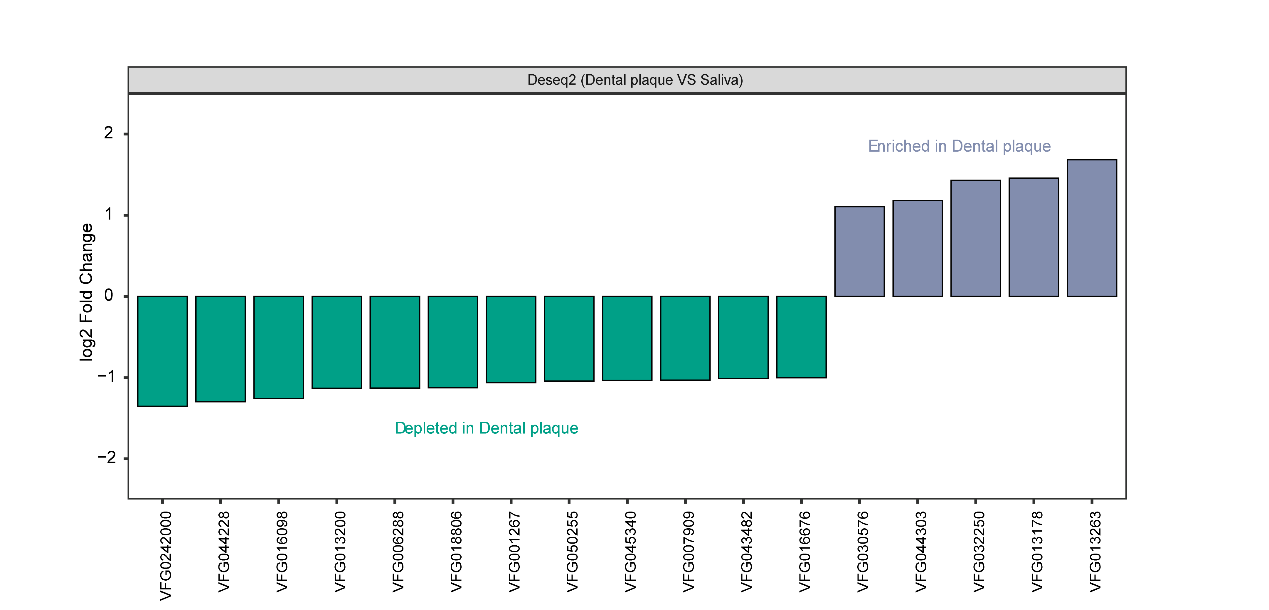


**Supplementary Figure7.** Differential analysis of the top 300 virulence factors in relative abundance between saliva and dental plaque was performed using DESeq2. Virulence factors with |log2 FoldChange| > 1 and *P* < 0.05 were considered to have significantly different relative abundances between the two groups.
